# Supplementary material for: A Hybrid Deep Learning–Based Feature Selection Approach for Supporting Early Detection of Long-Term Behavioral Outcomes in Survivors of Cancer: Cross-Sectional Study
Source: JMIR Bioinform Biotechnol. 2025 Mar 13;6:e65001. doi: 10.2196/65001 (PMC11950700; doi:10.2196/65001)
Supplement: Multimedia Appendix 1 [file bioinform_v6i1e65001_app1.docx]

**Multimedia Appendix 1.** Step-by-step pseudocode algorithm for the multimetric, majority-voting filter.

| *Input:*  *F*: [*F1*, *F2*, ..., *Fk*], where *F* is a set of all input candidate features *Fi* of the pre-processed clinical records, for *1* ≤ *i* ≤ *k* and *k* ∈ *Z++*  *B_Outcome*:Behavioral Outcome  *D_Train*: Training Data Set on *F*  *MIC*:[*MIC1*, *MIC2*, ..., *MICk*], where *MIC* is a set of the corresponding maximal information coefficient values *MICi* between *Fi* and *B_Outcome* computed on *D_Train*, for *1* ≤ *i* ≤ *k*, *MICi* ∈ *MIC*, and *k* ∈ *Z++*  *1-GI*: [*1-GI1*, *1-GI2*, ..., *1-GIk*], where *1-GI* is a set of the corresponding *1-Gini Indexi (GIi)* values between *Fi* and *B_Outcome* computed on *D_Train,* for *1* ≤ *i* ≤ *k*, *1-GIi* ∈ *1-GI*, and *k* ∈ *Z++*  *CS*: [*CS1*, *CS2*, ..., *CSk*], where *CS* is a set of the corresponding correlation score values *CSi*, i.e., Pearson Correlation Coefficient (PCC), Point Bi-Serial Correlation (PBC), or φ-Coefficient (φ), between *Fi* and *B_Outcome* computed on *D_Train* based upon the data type of *Fi* and *B_Outcome* for *1* ≤ *i* ≤ *k*, *CSi* ∈ *CS*, and *k* ∈ *Z++*  *IG*: [*IG1*, *IG2*, ..., *IGk*], where *IG* is a set of the corresponding Information Gain *IGi* values between *Fi* and *B_Outcome* computed on *D_Train*, for *1* ≤ *i* ≤ *k*, *IGi* ∈ *IG*, and *k* ∈ *Z++*  *N*: The Number of Non-redundant Input Candidate Features *Fi* Expected by Domain Experts, where *Fi* ∈ *F*, *N* ≤ *k*, and *k* ∈ *Z++*  Output:  *F3M****+***: [*T1*, *T2*, …, *Tp*], where *F3M****+*** is a set of all non-redundant input candidate features *Tj* selected by at least three metrics, i.e., *MICj*, *1-GIj*, *CSj*, and *IGj*, for *1* ≤ *j* ≤ *p*, *Tj* ∈ *F*, *MICj* ∈ *MIC, 1-GIj* ∈ *1-GI, CSj* ∈ *CS, IGj* ∈ *IG,* and *p* ∈ *Z++*  *F2M*: [*S1*, *S2*, …, *Sq*], where *F2M* is a set of all non-redundant input candidate features *Sℓ* selected by exactly two metrics, i.e., *MICℓ*, *1-GIℓ*, *CSℓ*, and *IGℓ*, for *1* ≤ *ℓ* ≤ *q*, *Sℓ* ∈ *F*, *MICℓ* ∈ *MIC, 1-GIℓ* ∈ *1-GI, CSℓ* ∈ *CS, IGℓ* ∈ *IG,* and *q* ∈ *Z++*  Initialization:  3Metrics+ = []# Store a set of candidate features *Fi* selected by at least three metrics, i.e., *MICi*, *1-GIi*, *CSi*, or *IGi*, where *1* ≤ *i* ≤ *k*, *Fi* ∈ *F*, *MICi* ∈ *MIC, 1-GIi* ∈ *1-GI, CSi* ∈ *CS, IGi* ∈ *IG,* and *k* ∈ *Z++*  2Metrics = []# Store aset ofcandidate features *Fi* selected by exactly two metrics, i.e., *MICi*, *1-GIi*, *CSi*, or *IGi*, where *1* ≤ *i* ≤ *k*, *Fi* ∈ *F*, *MICi* ∈ *MIC, 1-GIi* ∈ *1-GI, CSi* ∈ *CS, IGi* ∈ *IG,* and *k* ∈ *Z++*  3+2Metrics = [] # Store a set of candidate features *Fi* from both 3Metrics+ and 2Metrics  *Rank* = [] # Store a set of mean rank positions for each feature in 3+2Metrics. The smaller the position value, the higher the feature rank.  MIC_Feature_Score = [] # Store a set of 1 – MIC[*fi*, *fj*] values between any pair of two features *fi* and *fj* in 3+2Metrics computed on *D_Train*, where *i* ≠ *j*.  CS_Feature_Score = [] # Store a set of 1 – CS[*fi*, *fj*] values between any pair of two features *fi* and *fj* in 3+2Metrics computed on *D_Train*, where *i* ≠ *j*.  M = *N #*Set the initial number of available input candidate features, where M ≥ N and M ≤ k, for M, N, k ∈ *Z++* |
| --- |
| Processing:  *STAGE 1A –* Select the Top *N* Features Per Metric  *STEP 1*: Sort *Fi*s in the descending order, according to their *MICi*, *1*-*GIi*, *CSi*, and *IGi* values, by the developed *sort_features* function and then store their corresponding top M features in the sets, i.e., *FMIC*, *F1-GI*, *FCS*, and *FIG*.  *FMIC* = *sort_features*(*F*, by = *MIC*, ascending = *False*).top(M)  *F1-GI* = *sort_features*(*F*, by = *1-GI*, ascending = *False*).top(M)  *FCS* = *sort_features*(*F*, by = *CS*, ascending = *False*).top(M)  *FIG* = *sort_features*(*F*, by = *IG*, ascending = *False*).top(M)  *STEP 2*: Create a set *FUNION* = *FMIC* UAF1-G1 UAFCS UAF1G, where UA is a UNION ALL operator that can combine two or more result sets with duplicate values.  *STEP 3*: Check if a feature *Fi* ∈ *F* appears in at least three metrics in *FUNION* and then store it in 3Metrics+.  for *f* in *FUNION*:  if COUNT(*f*) ≥ 3 in *FUNION*:  3Metrics+.add(*f*)  *STEP 4*: Check if a feature *Fi* ∈ *F* appears in exactly two metrics in *FUNION* and then store it in 2Metrics.  for *f* in *FUNION*:  if COUNT(*f*) == 2 in *FUNION*:  2Metrics.add(*f*)  *STEP 5*: Create a set 3+2Metrics = 3Metrics+ U 2Metrics, where U is a UNION operator that can combine two or more result sets without duplicate values.  *STEP 6*: Calculate the mean ranking position of each feature *Fi* ∈ *F* in 3+2Metrics by the developed *rank* function and then store it in the 1D matrix, i.e., *Rank*.  for *f* in 3+2Metrics:  *rMIC* = *rank*(*f*, *FMIC*)  *r1-GI* = *rank*(*f*, *F1-GI*)  *rCS* = *rank*(*f*, *FCS*)  *rIG* = *rank*(*f*, *FIG*)  *rf* =  *Rank*[*f*] = *rf*  *STEP 7*: Evaluate if the algorithm has enough input candidate features *Fi*s, expected by domain experts, for the redundancy checking.  if size(3Metrics+) > *N*:  3Metrics+ = *sort_features*(3Metrics+, by = *Rank*, ascending = *True*)  del 3Metrics+[*N*:]  3+2Metrics = 3Metrics+ U 2Metrics  Return 3Metrics+, 2Metrics, and 3+2Metrics  elseif size(3Metrics+) + size(2Metrics) < *N*:  M = M + 1  GoTo *STEP 1*  else:  Return 3Metrics+, 2Metrics, and 3+2Metrics  *STAGE 1B* – Remove Redundant Input Features  *STEP 1:* Compute 1 – MIC[*fi*, *fj*] values and 1 – CS[*fi*, *fj*] values, by the developed *compute_MIC* and *compute_CS* functions between any pair of two features *f1* and *f2* in 3+2Metrics.  for *f1* in 3+2Metrics:  for *f2* in 3+2Metrics:  if *f1* ≠ *f2*:  MIC[*f1*, *f2*] = *compute_MIC(f1*, *f2*)  CS[*f1*, *f2*] ] = *compute_CS(f1*, *f2*)  MIC_Feature_Score[*f1*, *f2*] = 1 – MIC[*f1*, *f2*]  CS_Feature_Score[*f1*, *f2*] = 1 – CS[*f1*, *f2*]  *STEP 2*: Iterate each value in MIC_Feature_Score and CS_Feature_Score between any pair of two features *f1* and *f2* in 3+2Metrics and then remove the redundant one, i.e., MIC_Feature_Score[*f1*, *f2*] < 0.05 and CS_Feature_Score[*f1*, *f2*] < 0.05, according to their counts and ranks in 3Metrics+ and 2Metrics, where 0.05 is the defined threshold.  let Temp = 3+2Metrics  for *f1* in 3+2Metrics:  for *f2* in 3+2Metrics:  if *f1* ≠ *f2* AND MIC_Feature_Score[*f1*, *f2*] < 0.05 AND CS_Feature_Score[*f1*, *f2*] < 0.05:  if *f1* in 3Metrics+ AND *f2* in 2Metrics:  Temp.remove(*f2*)  elseif *f2* in 3Metrics+ AND *f1* in 2Metrics:  Temp.remove(*f1*)  elseif *f1* in 3Metrics+ AND *f2* in 3Metrics+:  if COUNT(*f1*) in *FUNION* > COUNT(*f2*) in *FUNION*:  Temp.remove(*f2*)  elseif COUNT(*f2*) in *FUNION* > COUNT(*f1*) in *FUNION*:  Temp.remove(*f1*)  elseif *Rank*[*f1*] > *Rank*[*f2*]:  Temp.remove[*f2*]  else:  Temp.remove[*f1*]  elseif *f1* in 2Metrics AND *f2* in 2Metrics:  if *Rank*[*f1*] > *Rank*[*f2*]:  Temp.remove[*f2*]  else:  Temp.remove[*f1*]  3+2Metrics = Temp    *STEP 3*: Split 3+2Metrics into two sets, *F3M+* and *F2M*  for *f* in 3+2Metrics:  if COUNT(*f*) >= 3 in *FUNION*:  *F3M+*.add(*f*)  else:  *F2M*.add(*f*)  *STEP 4*: Return *F3M+* and *F2M* if the algorithm has enough non-redundant input candidate features *Fi*s, expected by domain experts, or go back to *STEP 1* of *STAGE 1A*.  if size(*F3M+*) + size(*F2M*) < *N*:  M = M + 1  GoTo *STEP 1* of *STAGE 1A*  else:  Return *F3M+* and *F2M* |
