# Supplementary material for: A Hybrid Deep Learning–Based Feature Selection Approach for Supporting Early Detection of Long-Term Behavioral Outcomes in Survivors of Cancer: Cross-Sectional Study
Source: JMIR Bioinform Biotechnol. 2025 Mar 13;6:e65001. doi: 10.2196/65001 (PMC11950700; doi:10.2196/65001)
Supplement: Multimedia Appendix 2 [file bioinform_v6i1e65001_app2.docx]

**Multimedia Appendix 2.** Step-by-step pseudocode algorithm for the DDN network.

| *Input:*  *N*: The Number of Non-redundant Input Candidate Features *Fi* Expected by Domain Experts, where *Fi* ∈ *F*, *N* ≤ *k*, and *k* ∈ *Z++*  *F3M+*: [*T1*, *T2*, ..., *Tp*], where *F3M+* is a set of all non-redundant input candidate features *Tj* selected by at least three metrics, i.e., *MICj*, *1-GIj*, *CSj*, and *IGj*, for *1* ≤ *j* ≤ *p*, *Tj* ∈ *F*, *MICj* ∈ *MIC, 1-GIj* ∈ *1-GI, CSj* ∈ *CS, IGj* ∈ *IG,* and *p* ∈ *Z++*  *F2M*: [*S1*, *S2*, ..., *Sq*], where *F2M* is a set of all non-redundant input candidate features *Sℓ* selected by exactly two metrics, i.e., *MICℓ*, *1-GIℓ*, *CSℓ*, and *IGℓ*, for *1* ≤ *ℓ* ≤ *q*, *Sℓ* ∈ *F*, *MICℓ* ∈ *MIC, 1-GIℓ* ∈ *1-GI, CSℓ* ∈ *CS, IGℓ* ∈ *IG,* and *q* ∈ *Z++*  *B_Outcome*: Behavioral Outcome  *Drop_Out_Rate*: [0.0, 0.1, 0.2, 0.3, 0.4, 0.5, 0.6, 0.7, 0.8, 0.9] is a set of fine-tuning dropout rates for building a DDN network.  *D_Train*: Training Data Set on *F3M+*  *Z*: [*Z1*, *Z2*, … *Zn*], where *Z* is a set of *Zr*s, for *Zr* is a possible subset combination of *F2M*, *Zr* ≠ θ, and |*Zr*| ≤ *N* - |*F3M+*|, 1 ≤ *r* ≤ *n*, and *n* ∈ Z++  *M*: [*F3M+* + *Zr*], where *M* is a set of *F3M+* U *Zr*, for *Zr* is a possible subset combination of *F2M*, *Zr* ≠ θ, and |*Zr*| ≤ *N* - |*F3M+*|, 1 ≤ *r* ≤ *n*, and *n* ∈ Z++  *E_Train*: Training Data Sets on *M*  *K*: The Number of Training Partitions on *D_Train* and *E_Train* for Performing Cross-Validation (CV)  *Output:*  *Final_Features*: A Set of Final Features Selected by the DDN Network for Building Machine Learning Classifiers.  *Initialization:*  Learning_Rate = 0.001 # The hyperparameter to govern the pace at which the optimizer algorithm updates the weight values of a DDN network.  Epochs = 500 # The hyperparameter to define the number of times that the learning optimizer works through the entire training dataset on a DDN network  Optimizer = "Adam" # The Adam Optimizer is used for training a DDN network  Loss_Function = "Binary Cross Entropy" # The logarithmic loss to track incorrect labeling of the data class by a DDN network and penalize the network if deviations in probability occur in classifying the labels.  Number_Of_Hidden_Layers = 2 # The number of hidden layers in a DDN network  Number_Of_Output_Layer = 1 # The number of output layer in a DDN network  Hidden_Layer_Size = Inline graphic 3 # The number of neurons in each hidden layer, where |F3M+| is the number of input features in F3M+  Output_Layer_Size = 1 # The number of neurons in the output layer  Hidden_Layer_Activation_Function = "Relu" # The neuron activation function used in each hidden layer  Output_Layer_Activation_Function = "Sigmoid" # The neuron activation function used in the output layer |
| --- |
| *Processing:*  *STEP 1*: Find the best dropout rate, by using the *Grid-Search* technique, F1-score, and *K*-fold cross-validation, on *D_Train*, *F3M+*, *B_Outcome*, and *Drop_Out_Rate* of a DDN network constructed by the *create_DDN* function.  let maxF1-score = 0  let bestDropOutRate = 0  for *dor* in *Drop_Out_Rate*:  DDN = *create_DDN*(*dor*, | *F3M+*|, Number_Of_Hidden_Layers, Number_Of_Output_Layer, Hidden_Layer_Size, Output_Layer_Size, Hidden_Layer_Activation_Function, Output_Layer_Activation_Function)  F1-score[*dor*] = DNN.train_model(*D_Train*, *B_Outcome*, *K*, Learning_Rate, Epochs, Optimizer, Loss_Function)  if F1-score[*dor*] > maxF1-score:  maxF1-score = F1-score[*dor*]  bestDropOutRate = *dor*  *STEP 2*: Construct a DDN network, by the *create_DDN* function, on bestDropOutRate, *D_Train*, *F3M+*, and *B_Outcome*, and then perform *K*-fold cross-validation to obtain the baseline F1 score, i.e., F1Baseline.  *STEP 3*: Iterate each feature set [*F3M+* + *Zr*] in *M* and construct a DDN network, by the *create_DDN* function, on bestDropOutRate, *E_Train*, [*F3M+* + *Zr*], and *B_Outcome*, and then perform the *K*-fold cross-validation to obtain its F1 score, i.e., F1r, where 1 ≤ *r* ≤ *n*  *Final_Features = F3M+*  F1Max = F1Baseline  for *fs* in *M*:  Hidden_Layer_Size =  DDN = *create_DDN*(bestDropOutRate, |*fs|*, Number_Of_Hidden_Layers, Number_Of_Output_Layer, Hidden_Layer_Size, Output_Layer_Size, Hidden_Layer_Activation_Function, Output_Layer_Activation_Function)  F1*fs* = DNN.train_model(*E_Train*, *B_Outcome*, *K*, Learning_Rate, Epochs, Optimizer, Loss_Function)  if F1*fs* > F1Max:  F1Max = F1*fs*  *Final_Features = fs*  *STEP 4*: Return *Final_Features* |
